# Supplementary material for: Synthesis of a monocationic μ-nitrido-bridged iron porphycene dimer and its methane oxidation activity
Source: Royal Society of Chemistry journal article supplement (doi:10.1039/d1dt02922c), 2021-01-01

**Supplementary Information for**

**Synthesis of a Monocationic  $\mu$ -Nitrido-Bridged Iron  
Porphycene Dimer and its Methane Oxidation Activity**

Yasuyuki Yamada,<sup>1,2,3\*</sup> Yusuke Miwa,<sup>1</sup> Yuka Toyoda,<sup>2</sup>

Tomoo Yamaguchi,<sup>1</sup> Shigehisa Akine,<sup>4</sup> and Kentaro Tanaka<sup>1\*</sup>

<sup>1</sup>*Department of Chemistry, Graduate School of Science, Nagoya University, Furo-cho, Chikusa-ku,  
Nagoya 464-8602, Japan*

<sup>2</sup>*Research Center for Materials Science, Nagoya University, Furo-cho, Chikusa-ku, Nagoya 464-8602,  
Japan*

<sup>3</sup>*JST, PRESTO, 4-1-8 Honcho, Kawaguchi, Saitama, 332-0012, Japan*

<sup>4</sup>*Graduate School of Natural Science and Technology, Kanazawa University, Kakuma-machi, Kanazawa,  
920-1192, Japan*

\*E-mail: [yy@chem.nagoya-u.ac.jp](mailto:yy@chem.nagoya-u.ac.jp), [kentaro@chem.nagoya-u.ac.jp](mailto:kentaro@chem.nagoya-u.ac.jp)

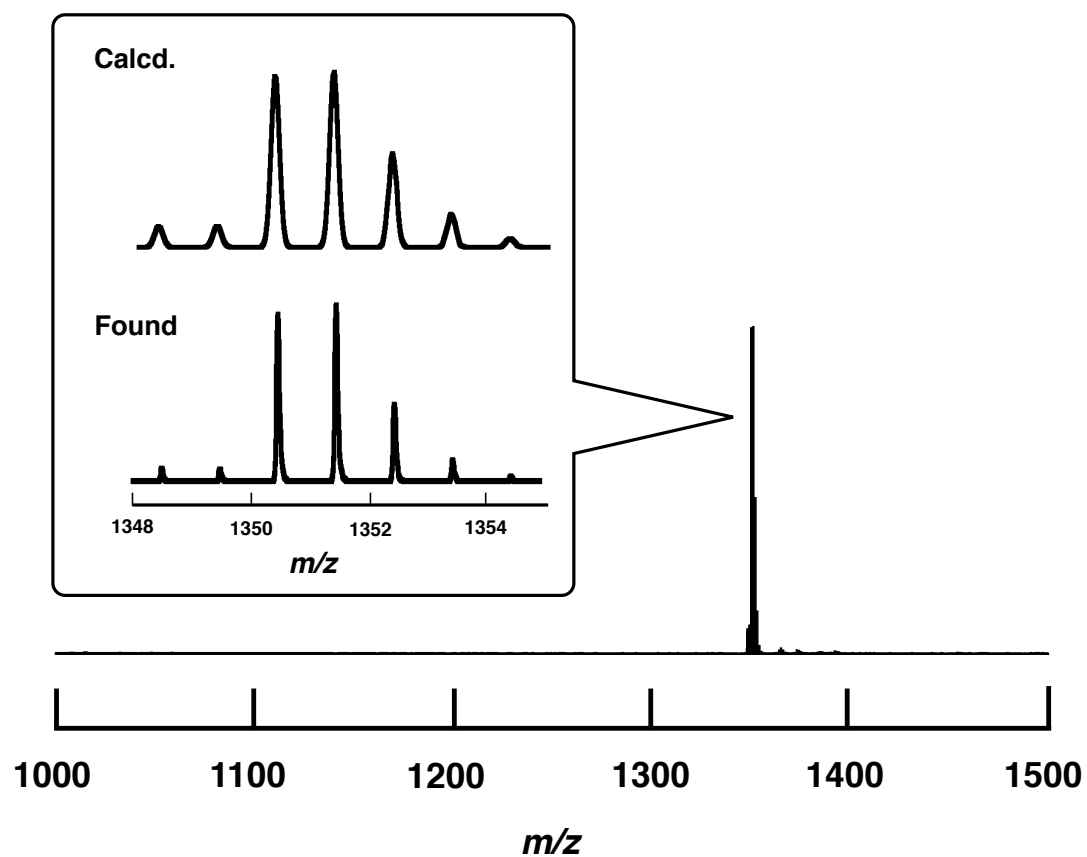

**Figure S1.** MALDI-TOF spectrum of  $2^+\cdot\text{PF}_6^-$ . Inset: Comparison of the calculated and observed isotopic distribution patterns of  $[2]^+$ .

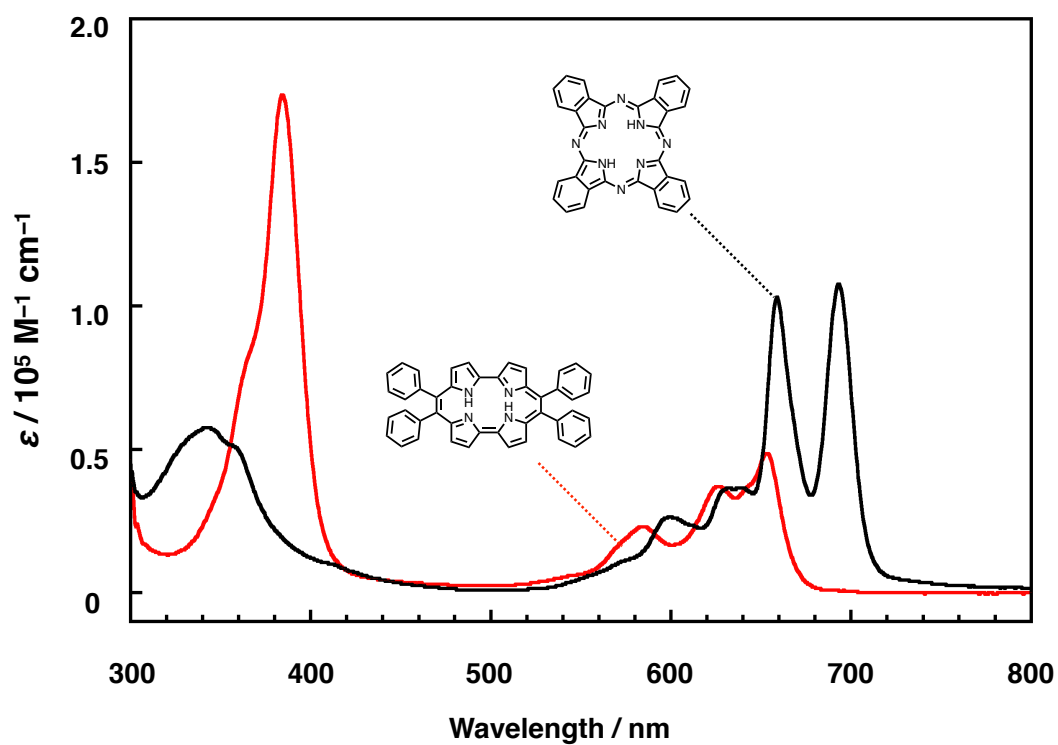

**Figure S2.** Comparison of UV-Vis spectra of a metal-free phthalocyanine and a metal-free porphycene in pyridine at 20 °C. [Substrate] = 2.0  $\mu\text{M}$ .

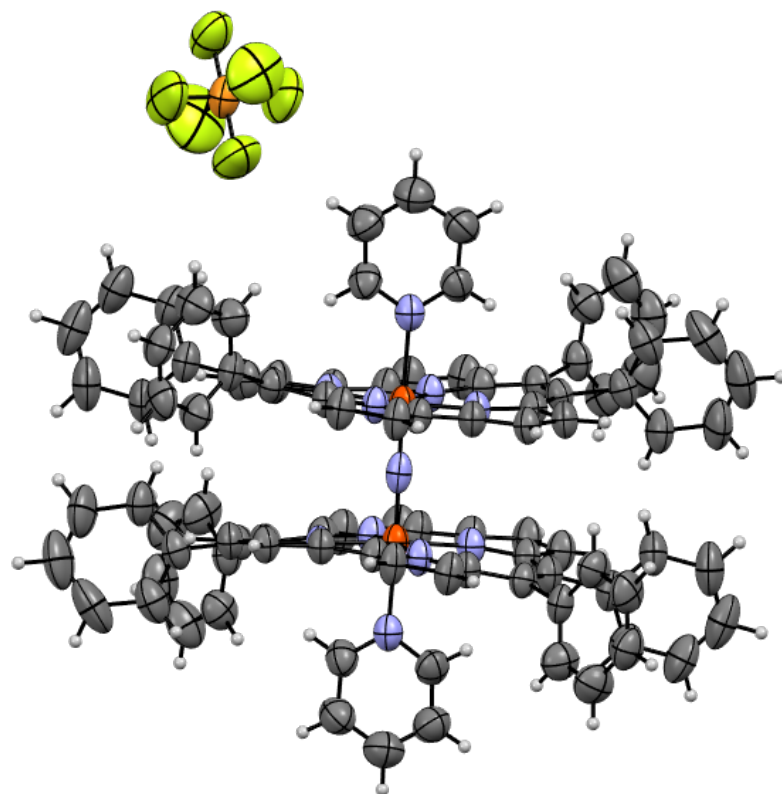

**Figure S3.** ORTEP representation of  $2^+\cdot\text{PF}_6^-$ . Displacement ellipsoids are drawn at a 50% probability level. The solvents ( $\text{CHCl}_3$ ) and a distorted coordinating pyridine were omitted for clarity.

**Table S1.** Amounts of the oxidized products observed in the reactions under methane (1.0 MPa) atmosphere using  $\mathbf{2^+ \cdot PF_6^- / SiO_2}$  as a catalyst.

| Entry | Catalyst                         | Reaction Time / h | Gas                       | Additive                                  | [CH <sub>3</sub> OH] / mM | [HCHO] / mM | [HCOOH] / mM | TTN <sub>eff</sub> |
|-------|----------------------------------|-------------------|---------------------------|-------------------------------------------|---------------------------|-------------|--------------|--------------------|
| 1     | $\mathbf{2^+ \cdot I^- / SiO_2}$ | 8                 | CH <sub>4</sub> (1.0 MPa) | ...                                       | 0.21                      | 0.18        | 0.32         | 8                  |
| 2     | $\mathbf{2^+ \cdot I^- / SiO_2}$ | 16                | CH <sub>4</sub> (1.0 MPa) | ...                                       | 0.27                      | 0.32        | 1.00         | 31                 |
| 3     | $\mathbf{2^+ \cdot I^- / SiO_2}$ | 24                | CH <sub>4</sub> (1.0 MPa) | ...                                       | 0.29                      | 0.29        | 1.74         | 69                 |
| 4     | $\mathbf{2^+ \cdot I^- / SiO_2}$ | 32                | CH <sub>4</sub> (1.0 MPa) | ...                                       | 0.30                      | 0.49        | 1.90         | 99                 |
| 5     | $\mathbf{2^+ \cdot I^- / SiO_2}$ | 48                | CH <sub>4</sub> (1.0 MPa) | ...                                       | 0.27                      | 0.35        | 3.43         | 179                |
| 6     | $\mathbf{2^+ \cdot I^- / SiO_2}$ | 24                | CH <sub>4</sub> (1.0 MPa) | 100 mM<br>Na <sub>2</sub> SO <sub>3</sub> | 0.16                      | 0.09        | 0.23         | 18                 |

All reactions were performed in the presence of methane (1.0 MPa), H<sub>2</sub>O<sub>2</sub> (189 mM), and TFA (51 mM) in H<sub>2</sub>O (3.0 mL) containing a  $\mathbf{2^+ \cdot PF_6^- / SiO_2}$  (55 μM as  $\mathbf{2^+ \cdot PF_6^-}$ ). Concentrations of the oxidized products observed in the presence of methane are the mean values of three different reactions. TTN<sub>eff</sub> values were calculated using equations (i) , (ii) in the main text.

**Table S2.** Amounts of the oxidized products observed in the reactions under N<sub>2</sub> (1.0 MPa) atmosphere (in the absence of methane) using **2<sup>+</sup>·PF<sub>6</sub><sup>-</sup>**/SiO<sub>2</sub> as a catalyst.

| Entry | Catalyst                                 | Reaction Time / h | Gas                      | Additive                                  | [CH <sub>3</sub> OH] / mM | [HCHO] / mM | [HCOOH] / mM | TTN(N <sub>2</sub> ) |
|-------|------------------------------------------|-------------------|--------------------------|-------------------------------------------|---------------------------|-------------|--------------|----------------------|
| 1     | <b>2<sup>+</sup>·I</b> /SiO <sub>2</sub> | 8                 | N <sub>2</sub> (1.0 MPa) | ...                                       | 0.11                      | 0.15        | 0.23         | 20                   |
| 2     | <b>2<sup>+</sup>·I</b> /SiO <sub>2</sub> | 16                | N <sub>2</sub> (1.0 MPa) | ...                                       | 0.13                      | 0.08        | 0.64         | 39                   |
| 3     | <b>2<sup>+</sup>·I</b> /SiO <sub>2</sub> | 24                | N <sub>2</sub> (1.0 MPa) | ...                                       | 0.11                      | 0.10        | 0.64         | 40                   |
| 4     | <b>2<sup>+</sup>·I</b> /SiO <sub>2</sub> | 32                | N <sub>2</sub> (1.0 MPa) | ...                                       | 0.11                      | 0.05        | 0.40         | 25                   |
| 5     | <b>2<sup>+</sup>·I</b> /SiO <sub>2</sub> | 48                | N <sub>2</sub> (1.0 MPa) | ...                                       | 0.10                      | 0.06        | 0.34         | 22                   |
| 6     | <b>2<sup>+</sup>·I</b> /SiO <sub>2</sub> | 24                | N <sub>2</sub> (1.0 MPa) | 100 mM<br>Na <sub>2</sub> SO <sub>3</sub> | 0.11                      | 0.06        | 0.16         | 12                   |

All reactions were performed in the absence of methane (under N<sub>2</sub> (1.0 MPa) atmosphere), H<sub>2</sub>O<sub>2</sub> (189 mM), and TFA (51 mM) in H<sub>2</sub>O (3.0 mL) containing a **2<sup>+</sup>·PF<sub>6</sub><sup>-</sup>**/SiO<sub>2</sub> (55 μM as **2<sup>+</sup>·PF<sub>6</sub><sup>-</sup>**). Concentrations of the oxidized products observed in the presence of methane are the mean values of three different reactions. TTN(N<sub>2</sub>) values were calculated using equation (ii) in the main text.

## checkCIF/PLATON report

You have not supplied any structure factors. As a result the full set of tests cannot be run.

THIS REPORT IS FOR GUIDANCE ONLY. IF USED AS PART OF A REVIEW PROCEDURE FOR PUBLICATION, IT SHOULD NOT REPLACE THE EXPERTISE OF AN EXPERIENCED CRYSTALLOGRAPHIC REFEREE.

No syntax errors found.      CIF dictionary      Interpreting this report

### Datablock: FePpc2N

---

|                        |                                         |                                           |
|------------------------|-----------------------------------------|-------------------------------------------|
| Bond precision:        | C-C = 0.0103 Å                          | Wavelength=0.41270                        |
| Cell:                  | a=29.2353 (7)                           | b=18.6740 (4)      c=19.5483 (6)          |
|                        | alpha=90                                | beta=95.911 (3)      gamma=90             |
| Temperature:           | 123 K                                   |                                           |
|                        | Calculated                              | Reported                                  |
| Volume                 | 10615.5 (5)                             | 10615.5 (5)                               |
| Space group            | C 2/c                                   | C 2/c                                     |
| Hall group             | -C 2yc                                  | -C 2yc                                    |
| Moiety formula         | C98 H66 Fe2 N11, F6 P,<br>5.2 (C H Cl3) | C98 H66 Fe2 N11, F6 P,<br>5.198 (C H Cl3) |
| Sum formula            | C103.20 H71.20 Cl15.60 F6<br>Fe2 N11 P  | C103.20 H71.20 Cl15.60 F6<br>Fe2 N11 P    |
| Mr                     | 2275.00                                 | 2275.00                                   |
| Dx, g cm <sup>-3</sup> | 1.423                                   | 1.423                                     |
| Z                      | 4                                       | 4                                         |
| Mu (mm <sup>-1</sup> ) | 0.170                                   | 0.171                                     |
| F000                   | 4614.4                                  | 4614.0                                    |
| F000'                  | 4619.00                                 |                                           |
| h, k, lmax             | 34, 22, 23                              | 34, 22, 23                                |
| Nref                   | 9394                                    | 9380                                      |
| Tmin, Tmax             | 0.996, 0.998                            | 0.131, 1.000                              |
| Tmin'                  | 0.993                                   |                                           |

Correction method= # Reported T Limits: Tmin=0.131 Tmax=1.000

AbsCorr = MULTI-SCAN

Data completeness= 0.999

Theta(max)= 14.220

R(reflections)= 0.0946( 5611)

wR2(reflections)=  
0.2853( 9380)

S = 1.041

Npar= 946

---

The following ALERTS were generated. Each ALERT has the format

**test-name\_ALERT\_alert-type\_alert-level.**

Click on the hyperlinks for more details of the test.

---

### Alert level B

RINTA01\_ALERT\_3\_B The value of Rint is greater than 0.18

Rint given 0.186

PLAT020\_ALERT\_3\_B The Value of Rint is Greater Than 0.12 ..... 0.186 Report

---

### Alert level C

CRYSC01\_ALERT\_1\_C The word below has not been recognised as a standard identifier.

bluish

|                                                               |              |
|---------------------------------------------------------------|--------------|
| PLAT084_ALERT_3_C High wR2 Value (i.e. > 0.25) .....          | 0.29 Report  |
| PLAT088_ALERT_3_C Poor Data / Parameter Ratio .....           | 9.93 Note    |
| PLAT232_ALERT_2_C Hirshfeld Test Diff (M-X) Fe1 --N5 .        | 5.7 s.u.     |
| PLAT234_ALERT_4_C Large Hirshfeld Difference C24 --C25 .      | 0.16 Ang.    |
| PLAT234_ALERT_4_C Large Hirshfeld Difference C36 --C37 .      | 0.18 Ang.    |
| PLAT260_ALERT_2_C Large Average Ueq of Residue Including P1   | 0.165 Check  |
| PLAT260_ALERT_2_C Large Average Ueq of Residue Including Cl1  | 0.140 Check  |
| PLAT260_ALERT_2_C Large Average Ueq of Residue Including Cl4  | 0.150 Check  |
| PLAT260_ALERT_2_C Large Average Ueq of Residue Including Cl7  | 0.138 Check  |
| PLAT260_ALERT_2_C Large Average Ueq of Residue Including Cl10 | 0.123 Check  |
| PLAT260_ALERT_2_C Large Average Ueq of Residue Including Cl13 | 0.247 Check  |
| PLAT260_ALERT_2_C Large Average Ueq of Residue Including Cl19 | 0.145 Check  |
| PLAT260_ALERT_2_C Large Average Ueq of Residue Including Cl22 | 0.155 Check  |
| PLAT260_ALERT_2_C Large Average Ueq of Residue Including Cl25 | 0.110 Check  |
| PLAT331_ALERT_2_C Small Aver Phenyl C-C Dist C21 --C26 .      | 1.37 Ang.    |
| PLAT341_ALERT_3_C Low Bond Precision on C-C Bonds .....       | 0.01031 Ang. |

---

### Alert level G

ABSMU01\_ALERT\_1\_G Calculation of \_exptl\_absorpt\_correction\_mu not performed for this radiation type.

|                                                                    |              |
|--------------------------------------------------------------------|--------------|
| PLAT002_ALERT_2_G Number of Distance or Angle Restraints on AtSite | 55 Note      |
| PLAT003_ALERT_2_G Number of Uiso or Uij Restrained non-H Atoms ... | 56 Report    |
| PLAT013_ALERT_1_G N.O.K. _shelx_hkl_checksum Found in CIF .....    | Please Check |
| PLAT042_ALERT_1_G Calc. and Reported Moiety Formula Strings Differ | Please Check |
| PLAT068_ALERT_1_G Reported F000 Differs from Calcd (or Missing)... | Please Check |
| PLAT083_ALERT_2_G SHELXL Second Parameter in WGHT Unusually Large  | 24.67 Why ?  |
| PLAT092_ALERT_4_G Check: Wavelength Given is not Cu,Ga,Mo,Ag,In Ka | 0.41270 Ang. |
| PLAT171_ALERT_4_G The CIF-Embedded .res File Contains EADP Records | 1 Report     |
| PLAT172_ALERT_4_G The CIF-Embedded .res File Contains DFIX Records | 19 Report    |
| PLAT174_ALERT_4_G The CIF-Embedded .res File Contains FLAT Records | 2 Report     |
| PLAT175_ALERT_4_G The CIF-Embedded .res File Contains SAME Records | 1 Report     |
| PLAT176_ALERT_4_G The CIF-Embedded .res File Contains SADI Records | 1 Report     |
| PLAT177_ALERT_4_G The CIF-Embedded .res File Contains DELU Records | 11 Report    |
| PLAT186_ALERT_4_G The CIF-Embedded .res File Contains ISOR Records | 11 Report    |
| PLAT300_ALERT_4_G Atom Site Occupancy of P1 Constrained at         | 0.5 Check    |



|                   |                                                  |                  |        |       |
|-------------------|--------------------------------------------------|------------------|--------|-------|
| PLAT300_ALERT_4_G | Atom Site Occupancy of F1                        | Constrained at   | 0.5    | Check |
| PLAT300_ALERT_4_G | Atom Site Occupancy of F2                        | Constrained at   | 0.5    | Check |
| PLAT300_ALERT_4_G | Atom Site Occupancy of F3                        | Constrained at   | 0.5    | Check |
| PLAT300_ALERT_4_G | Atom Site Occupancy of F4                        | Constrained at   | 0.5    | Check |
| PLAT300_ALERT_4_G | Atom Site Occupancy of F5                        | Constrained at   | 0.5    | Check |
| PLAT300_ALERT_4_G | Atom Site Occupancy of F6                        | Constrained at   | 0.5    | Check |
| PLAT301_ALERT_3_G | Main Residue Disorder .....                      | (Resd 1 )        | 11%    | Note  |
| PLAT302_ALERT_4_G | Anion/Solvent/Minor-Residue Disorder             | (Resd 2 )        | 100%   | Note  |
| PLAT302_ALERT_4_G | Anion/Solvent/Minor-Residue Disorder             | (Resd 3 )        | 100%   | Note  |
| PLAT302_ALERT_4_G | Anion/Solvent/Minor-Residue Disorder             | (Resd 4 )        | 100%   | Note  |
| PLAT302_ALERT_4_G | Anion/Solvent/Minor-Residue Disorder             | (Resd 5 )        | 100%   | Note  |
| PLAT302_ALERT_4_G | Anion/Solvent/Minor-Residue Disorder             | (Resd 6 )        | 100%   | Note  |
| PLAT302_ALERT_4_G | Anion/Solvent/Minor-Residue Disorder             | (Resd 7 )        | 100%   | Note  |
| PLAT302_ALERT_4_G | Anion/Solvent/Minor-Residue Disorder             | (Resd 8 )        | 100%   | Note  |
| PLAT302_ALERT_4_G | Anion/Solvent/Minor-Residue Disorder             | (Resd 9 )        | 100%   | Note  |
| PLAT302_ALERT_4_G | Anion/Solvent/Minor-Residue Disorder             | (Resd 10 )       | 100%   | Note  |
| PLAT302_ALERT_4_G | Anion/Solvent/Minor-Residue Disorder             | (Resd 11 )       | 100%   | Note  |
| PLAT304_ALERT_4_G | Non-Integer Number of Atoms in .....             | (Resd 2 )        | 3.50   | Check |
| PLAT304_ALERT_4_G | Non-Integer Number of Atoms in .....             | (Resd 3 )        | 1.77   | Check |
| PLAT304_ALERT_4_G | Non-Integer Number of Atoms in .....             | (Resd 4 )        | 1.27   | Check |
| PLAT304_ALERT_4_G | Non-Integer Number of Atoms in .....             | (Resd 5 )        | 1.88   | Check |
| PLAT304_ALERT_4_G | Non-Integer Number of Atoms in .....             | (Resd 6 )        | 1.51   | Check |
| PLAT304_ALERT_4_G | Non-Integer Number of Atoms in .....             | (Resd 7 )        | 1.39   | Check |
| PLAT304_ALERT_4_G | Non-Integer Number of Atoms in .....             | (Resd 8 )        | 0.69   | Check |
| PLAT304_ALERT_4_G | Non-Integer Number of Atoms in .....             | (Resd 9 )        | 2.12   | Check |
| PLAT304_ALERT_4_G | Non-Integer Number of Atoms in .....             | (Resd 10 )       | 1.17   | Check |
| PLAT304_ALERT_4_G | Non-Integer Number of Atoms in .....             | (Resd 11 )       | 1.19   | Check |
| PLAT432_ALERT_2_G | Short Inter X...Y Contact C11                    | ..C29            | 3.22   | Ang.  |
|                   |                                                  | x,-y,-1/2+z =    | 6_555  | Check |
| PLAT432_ALERT_2_G | Short Inter X...Y Contact C16                    | ..C36            | 3.05   | Ang.  |
|                   |                                                  | 1/2-x,1/2-y,-z = | 7_555  | Check |
| PLAT432_ALERT_2_G | Short Inter X...Y Contact C120                   | ..C31            | 3.22   | Ang.  |
|                   |                                                  | x,y,z =          | 1_555  | Check |
| PLAT789_ALERT_4_G | Atoms with Negative _atom_site_disorder_group    | #                | 10     | Check |
| PLAT790_ALERT_4_G | Centre of Gravity not Within Unit Cell: Resd.    | #                | 2      | Note  |
|                   | F6 P                                             |                  |        |       |
| PLAT790_ALERT_4_G | Centre of Gravity not Within Unit Cell: Resd.    | #                | 3      | Note  |
|                   | C H C13                                          |                  |        |       |
| PLAT790_ALERT_4_G | Centre of Gravity not Within Unit Cell: Resd.    | #                | 4      | Note  |
|                   | C H C13                                          |                  |        |       |
| PLAT790_ALERT_4_G | Centre of Gravity not Within Unit Cell: Resd.    | #                | 5      | Note  |
|                   | C H C13                                          |                  |        |       |
| PLAT790_ALERT_4_G | Centre of Gravity not Within Unit Cell: Resd.    | #                | 9      | Note  |
|                   | C H C13                                          |                  |        |       |
| PLAT790_ALERT_4_G | Centre of Gravity not Within Unit Cell: Resd.    | #                | 10     | Note  |
|                   | C H C13                                          |                  |        |       |
| PLAT790_ALERT_4_G | Centre of Gravity not Within Unit Cell: Resd.    | #                | 11     | Note  |
|                   | C H C13                                          |                  |        |       |
| PLAT811_ALERT_5_G | No ADDSYM Analysis: Too Many Excluded Atoms .... |                  | !      | Info  |
| PLAT860_ALERT_3_G | Number of Least-Squares Restraints .....         |                  | 580    | Note  |
| PLAT883_ALERT_1_G | No Info/Value for _atom_sites_solution_primary . |                  | Please | Do !  |
| PLAT933_ALERT_2_G | Number of OMIT Records in Embedded .res File ... |                  | 1      | Note  |
| PLAT965_ALERT_2_G | The SHELXL WEIGHT Optimisation has not Converged |                  | Please | Check |
| PLAT984_ALERT_1_G | The Cl-f' = 0.0382 Deviates from the B&C-Value   |                  | 0.0553 | Check |
| PLAT984_ALERT_1_G | The F-f' = -0.0002 Deviates from the B&C-Value   |                  | 0.0038 | Check |
| PLAT985_ALERT_1_G | The Fe-f" = 0.3079 Deviates from the B&C-Value   |                  | 0.3056 | Check |

---

|    |                      |                                                              |
|----|----------------------|--------------------------------------------------------------|
| 0  | <b>ALERT level A</b> | = Most likely a serious problem - resolve or explain         |
| 2  | <b>ALERT level B</b> | = A potentially serious problem, consider carefully          |
| 17 | <b>ALERT level C</b> | = Check. Ensure it is not caused by an omission or oversight |
| 62 | <b>ALERT level G</b> | = General information/check it is not something unexpected   |
|    |                      |                                                              |
| 9  | ALERT type 1         | CIF construction/syntax error, inconsistent or missing data  |
| 19 | ALERT type 2         | Indicator that the structure model may be wrong or deficient |
| 7  | ALERT type 3         | Indicator that the structure quality may be low              |
| 45 | ALERT type 4         | Improvement, methodology, query or suggestion                |
| 1  | ALERT type 5         | Informative message, check                                   |

---

It is advisable to attempt to resolve as many as possible of the alerts in all categories. Often the minor alerts point to easily fixed oversights, errors and omissions in your CIF or refinement strategy, so attention to these fine details can be worthwhile. In order to resolve some of the more serious problems it may be necessary to carry out additional measurements or structure refinements. However, the purpose of your study may justify the reported deviations and the more serious of these should normally be commented upon in the discussion or experimental section of a paper or in the "special\_details" fields of the CIF. checkCIF was carefully designed to identify outliers and unusual parameters, but every test has its limitations and alerts that are not important in a particular case may appear. Conversely, the absence of alerts does not guarantee there are no aspects of the results needing attention. It is up to the individual to critically assess their own results and, if necessary, seek expert advice.

### **Publication of your CIF in IUCr journals**

A basic structural check has been run on your CIF. These basic checks will be run on all CIFs submitted for publication in IUCr journals (*Acta Crystallographica*, *Journal of Applied Crystallography*, *Journal of Synchrotron Radiation*); however, if you intend to submit to *Acta Crystallographica Section C* or *E* or *IUCrData*, you should make sure that full publication checks are run on the final version of your CIF prior to submission.

### **Publication of your CIF in other journals**

Please refer to the *Notes for Authors* of the relevant journal for any special instructions relating to CIF submission.

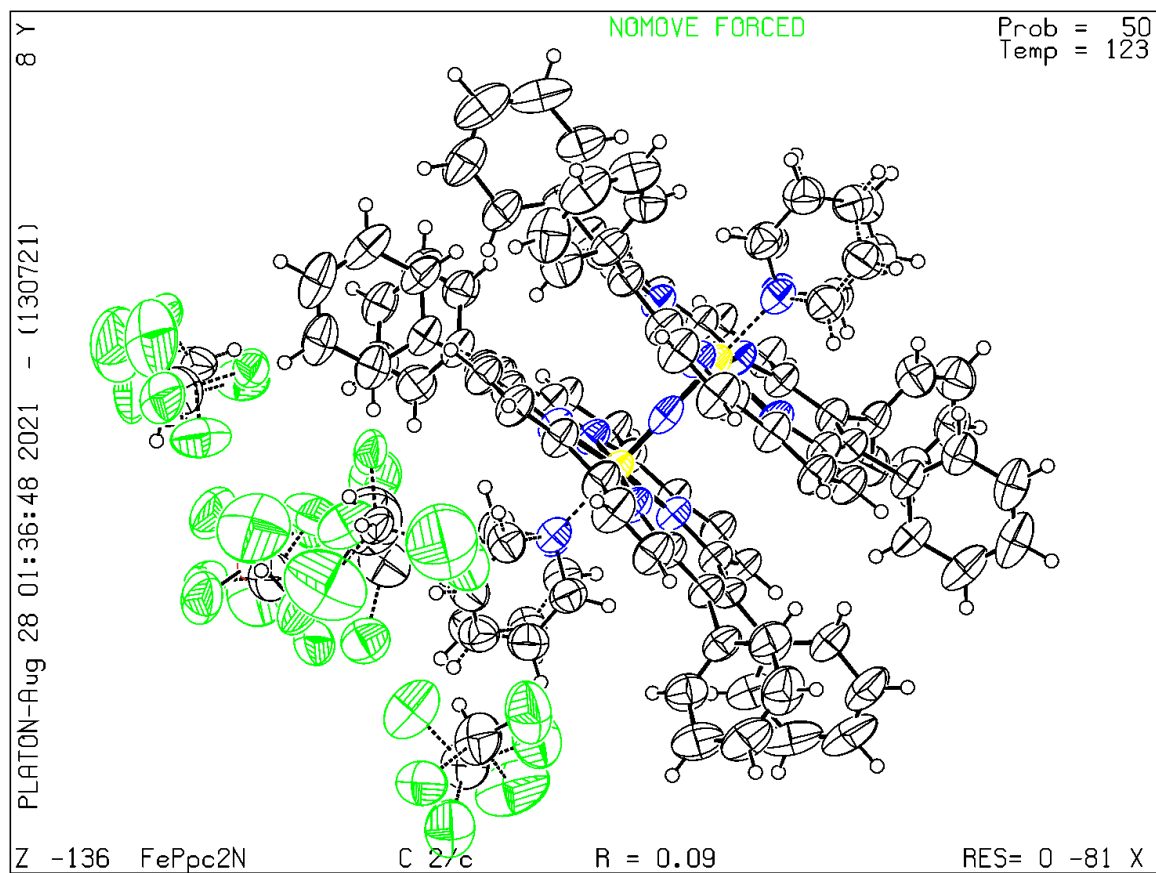

Supplement: d1dt02922c1.pdf [file d1dt02922c1.pdf]
